1 **Title: Exercise enhances motor skill learning by neurotransmitter switching in the**  
2 **adult midbrain**

3 **Authors:** Hui-quan Li\*, Nicholas C. Spitzer

4 **Affiliations:** Neurobiology Section, Division of Biological Sciences and Center for Neural  
5 Circuits and Behavior, Kavli Institute for Brain and Mind, University of California San Diego,  
6 La Jolla, California 92093-0357

7 \*Correspondence to: hul008@ucsd.edu

8  
9 **Abstract:** Physical exercise promotes motor skill learning in normal individuals and those  
10 with neurological disorders but its mechanism of action is unclear. We found that one week  
11 of voluntary wheel running enhances the acquisition of motor skills in adult mice. One  
12 week of running also induces switching from ACh to GABA expression in neurons in the  
13 caudal pedunculo-pontine nucleus (cPPN). The switching neurons make projections to the  
14 substantia nigra (SN), ventral tegmental area (VTA) and ventrolateral-ventromedial nuclei  
15 of the thalamus (VL-VM), which regulate acquisition of motor skills. Use of viral vectors to  
16 override transmitter switching blocks the beneficial effect of running on motor skill  
17 learning. We suggest that neurotransmitter switching provides the basis by which  
18 sustained running benefits motor skill learning, presenting a new target for clinical  
19 treatment of movement disorders.

20  
21 **Main:** Motor skill learning is fundamental to everyday life and is regulated by a neural  
22 network involving the cortex, thalamus, basal ganglia, brain stem, cerebellum and spinal  
23 cord (1,2). Both neuronal and glial plasticity are essential for motor skill learning and  
24 disruption of this plasticity causes motor deficits (3,4). Aerobic physical exercise promotes  
25 the ability to acquire new motor skills (5) and serves as a therapy for many motor  
26 disorders (6-8), but its basis of action is not well understood. Running is a natural motor

27 activity for mice (9) and generates plasticity in multiple brain regions (4,10,11).  
28 Neurotransmitter switching is a newly appreciated form of plasticity that refers to the  
29 ability of neurons to change their transmitter identity in response to sustained stimuli,  
30 typically leading to changes in behavior (12). We hypothesized that chronic running  
31 induces neurotransmitter switching in a circuit that is important for motor skill learning.

32

## 33 **Results**

34 **Sustained running enhances motor skill learning.** We investigated the impact of chronic  
35 voluntary running on motor skill learning by exposing adult mice to running wheels for one  
36 week (Fig. 1a). Each mouse spent consistent time on the wheel every day, indicating  
37 continuous interest, and their running skill improved as measured by increased running  
38 speed, increased duration of running episodes and more stable movement on the wheel  
39 (Fig. 1b and Supplementary Fig. 1a,b). At the end of the running period we assessed  
40 performance on the rotarod and balance beam to evaluate motor skill acquisition. In  
41 comparison to mice without running wheels, mice that ran for one week demonstrated  
42 enhanced learning of motor skills, mastering an accelerating rotarod more rapidly and  
43 accommodating to balance beams more quickly (Fig. 1c-f and Supplementary Fig. 1c,d).

44

45 We calculated the slopes of learning curves to assess the speed of motor skill learning.  
46 Mean data points for each training trial were plotted and fitted and the coefficient of  
47 determination ( $R^2$ ) was used to justify the fit. The mean speed at fall from a rotarod for the  
48 nine trials on the training day was fitted by a one-phase association model ( $R^2 > 0.96$  for  
49 controls;  $R^2 > 0.95$  for runners).

$$y(t) = y_0 + (A - y_0)(1 - e^{-kt})$$

50  $y(t)$  is the speed at fall on trial number  $t$ ,  $y_0$  is the speed at fall for the first trial ( $t = 0$ ),  $A$   
51 is the plateau and  $k$  is a rate constant.

52 The slopes were calculated with

$$y'(t) = \frac{dy}{dt} = ke^{-kt}(A - y_0)$$

53 To calculate the initial slope,  $y'(0)$ , we used

$$y'(0) = g(k, A) = k(A - y_0)$$

54 The standard errors were calculated with

$$\begin{aligned}\frac{\partial g}{\partial k} &= (A - y_0) \\ \frac{\partial g}{\partial A} &= k \\ \delta g &= \sqrt{\left(\frac{\partial g}{\partial k} \delta k\right)^2 + \left(\frac{\partial g}{\partial A} \delta A\right)^2} \\ &= \sqrt{(A - y_0)^2 \delta k^2 + k^2 \delta A^2}\end{aligned}$$

55 The values of the slopes are presented as  $g \pm \delta g$  (mean  $\pm$  sem). Initial slopes were  $17 \pm 4$   
56 rpm/trial for runners and  $5 \pm 2$  rpm/trial for controls, significantly steeper for the runners  
57 ( $p=0.01$ , Welch's t-test) (Fig. 1c).

58 The mean time to cross a 4 mm rod beam for the three trials on the training day was fitted  
59 by linear regression ( $R^2 > 0.98$  for controls;  $R^2 > 0.99$  for runners)

$$y(t) = y_0 + kt$$

60  $y(t)$  is the time to cross the beam on trial number  $t$ ,  $y_0$  is the time for the first trial ( $t = 0$ )  
61 and  $k$  is the slope

$$y'(t) = k$$

62 The values of the slopes are presented as  $k \pm \delta k$  (mean  $\pm$  sem). The slopes were  $-4.7 \pm 0.5$   
63 s/trial for runners and  $-2.4 \pm 0.3$  s/trial for controls, again significantly steeper for runners  
64 ( $p < 0.001$ , Welch's t-test) (Fig. 1e). Additionally, sustained running improved rotorod and  
65 balance beam test performance (Fig. 1d,f and Supplementary Fig. 1d) but did not affect  
66 basal locomotor activity as measured by infrared beam crossings in home cages  
67 (Supplementary Fig. 1e,f).

68

69 To explore further the effect of running on enhancement of motor skill learning, we  
70 removed running wheels from mouse cages after the first motor skill tests and retested the  
71 mice after different resting periods (Fig. 1g). Enhanced performance on both rotarod and  
72 balance beam was sustained up to 2 weeks but not 4 weeks (Fig. 1h,i). Moreover, when  
73 mice were not trained on the rotarod and balance beam until 1 week after running, their  
74 motor skill learning was not enhanced (Fig. 1j). This result suggests that running creates a  
75 sensitive period in the adult brain during which motor skill learning is improved and shows  
76 that the gain in motor skills persists longer than the duration of this period (Fig. 1k).

77

78 **Running induces transmitter switching in the midbrain cPPN.** Because transmitter  
79 switching is activity-dependent (13-15), we first searched for c-fos expression (Fig. 2a) to  
80 determine sites of increased brain activity associated with running and to identify neurons  
81 likely to switch their transmitter. Mice that ran for 1 week exhibited a 6-fold increase in the  
82 number of c-fos+ neurons in the pedunculopontine nucleus (PPN) of the midbrain  
83 compared to non-runner controls when examined immediately after the end of the last  
84 running period (Fig. 2b,c). The dentate gyrus also showed increased c-fos expression in  
85 runners, as expected (16). The PPN was an attractive candidate for running-induced  
86 transmitter switching because it regulates gait and balance control in health (17,18) and  
87 disease (19). However, the rostral and caudal PPN (rPPN and cPPN) are distinct. Both  
88 contain glutamatergic, GABAergic and cholinergic neurons, but there are important  
89 differences in the proportions of their transmitter phenotypes (20), their projection targets  
90 and activity during movement (18,21), and their roles in behavior (22-24). Accordingly we  
91 looked for differences in the activation of the rPPN and cPPN.

92

93 Specifically, we asked whether running activates cholinergic neurons differently in the

94 rPPN and cPPN, because cholinergic neurons are involved in the gait and postural  
95 disorders of Parkinson's disease (25). One week of running increased the number of c-fos+  
96 neurons in both rPPN and cPPN (Supplementary Fig. 2). However, running dramatically  
97 increased the percentage of choline acetyltransferase (ChAT)+c-fos+ neurons in the ChAT+  
98 neuron population by 22-fold in the cPPN but increased the percentage by only 2.1-fold in  
99 the rPPN (Fig. 2d,e, the left panel of 2f, and Supplementary Fig. 3a). Moreover, the  
100 percentage of ChAT+c-fos+ neurons in the c-fos+ neuron population was not different  
101 between runners and controls in the rPPN but increased 6-fold between runners and  
102 controls in the cPPN (Fig. 2f, right). Significantly, running increased the number of  
103 non-cholinergic c-fos+ neurons in the cPPN by only 1.5-fold, much less than the 15-fold  
104 increase in the number of ChAT+c-fos+ neurons (Supplementary Fig. 3a). The increased  
105 proportion of c-fos+ neurons in the population of ChAT+ cPPN neurons and the increased  
106 proportion of ChAT+ neurons in the population of c-fos+ cPPN neurons occurred after as  
107 early as 3 days of running (Supplementary Fig. 3b,c). These results show that cPPN  
108 cholinergic neurons are more strongly activated by sustained running than rPPN  
109 cholinergic neurons or cPPN non-cholinergic neurons, identifying cPPN cholinergic  
110 neurons as candidates for transmitter switching.

111

112 Indeed, chronic running for one week was accompanied by a decrease in the number of  
113 cPPN neurons expressing both ChAT (Fig. 2g,h) and the vesicular acetylcholine transporter  
114 (VAcHT) (Supplementary Fig. 4). This change was accompanied by an equal increase in the  
115 number of cPPN neurons expressing the gene encoding glutamic acid decarboxylase (GAD1)  
116 that generates GABA (Fig. 2i,j). No neurogenesis or apoptosis was observed in the cPPN of  
117 either control or runner mice (Supplementary Fig. 5). These results suggest that ~600  
118 cPPN neurons switched their transmitter from ACh to GABA. There was no change in the  
119 number of ChAT+ neurons in the rPPN or the adjacent lateral dorsotegmental nucleus and

120 no difference in the number of neurons expressing the vesicular glutamate transporter 2  
121 (vGluT2) in the cPPN (Supplementary Fig. 6).

122

123 Mice that had run for 1 week, not subjected to behavioral tests, and allowed 1 week of rest  
124 now exhibited the same number of ChAT+ and GAD1+ neurons as control mice that had  
125 never run on a running wheel (Fig. 2k). No apoptosis or neurogenesis was detected in the  
126 cPPN of these mice (Supplementary Fig. 5c-f), indicating that the transmitter switch had  
127 spontaneously reversed. The time during which the transmitter switch persists (Fig. 2k)  
128 corresponds to the time during which the benefit of running on motor skill acquisition can  
129 occur (Fig. 1j,k), indicating a temporal correlation between transmitter switching and  
130 enhanced motor skill learning. This finding raised the possibility that the transmitter  
131 switch is necessary for running to enhance motor skill learning. Note that the transmitter  
132 switch reversed one week after running (Supplementary Fig. 7), even when training and  
133 testing on the rotorod and balance beam occurred immediately after running and the  
134 acquired motor skills persisted for at least 2 weeks (Fig. 1g-i). These results suggest that  
135 the transmitter switch is not necessary for maintaining the acquired motor skills.

136

137 To seek more direct evidence for neurotransmitter switching, we selectively tagged  
138 cholinergic neurons with genetic markers to reveal their change in transmitter identity  
139 following the exercise challenge. We used a well-characterized ChAT-Cre transgenic mouse  
140 line (26,27) that exhibited the same running-dependent loss of ChAT and gain of GAD1  
141 expression as wild-type mice (Supplementary Fig. 8). We injected a Cre-dependent AAV  
142 vector (AAV-DIO-mRuby2) into the cPPN to permanently label cholinergic neurons with  
143 mRuby2 even when they have lost ChAT after running (Fig. 3a,b). We then scored the  
144 number of mRuby2+ neurons that express ChAT and/or GABA immunofluorescence and  
145 found that in control mice, 65% of cPPN cholinergic neurons tagged by mRuby2 expressed

146 only ChAT, while 29% of them co-expressed ChAT and GABA, 4% expressed neither and 2%  
147 expressed only GABA (Fig. 3c). In runners, 24% of mRuby2+ neurons expressed only ChAT,  
148 31% co-expressed ChAT and GABA, 12% expressed neither and 33% expressed only GABA  
149 (Fig. 3c). The decrease in neurons expressing only ChAT and increase in neurons  
150 expressing only GABA in the ChAT-Cre line identify the expression of GABA in formerly  
151 cholinergic neurons. More modest co-expression of ChAT and GAD has been observed in  
152 different transgenic mouse lines (28). The increase in number of neurons that express  
153 neither ChAT nor GABA suggests that switching neurons lose ChAT before gaining GABA.

154

### 155 **Switching involves regulation of transcript levels of transmitter synthetic enzymes.**

156 To understand whether the loss of ChAT and gain of GAD1 occur in the same population of  
157 neurons at the transcript level, we used sensitive fluorescence *in situ* hybridization to  
158 analyze the levels of mRNA of transmitter synthetic enzymes in cPPN neurons from  
159 runners and controls. We used the expression of neuronal nitric oxide synthase (nNOS) as a  
160 biomarker restricted to ChAT+ neurons in the PPN (29) (Fig. 4a,b). Although the number of  
161 ChAT+ neurons decreased with one week of running (Fig. 2g,h), the number of nNOS+  
162 neurons did not change (Fig. 4c). We then combined immunofluorescent labeling of nNOS  
163 with RNAscope to detect mRNA encoding ChAT and GAD1 in nNOS+ neurons. By measuring  
164 the number of transcript puncta (Fig. 4d-g) and the total fluorescent area and fluorescence  
165 intensity per cell (Supplementary Fig. 9), we demonstrated a decrease in the number of  
166 ChAT transcripts and an increase in the number of GAD1 transcripts in neurons expressing  
167 nNOS in runners. While RNAscope revealed the presence of ChAT transcripts in all nNOS  
168 neurons in controls (Fig. 4e), immunostaining identified 11% of nNOS neurons that did not  
169 show ChAT immunoreactivity (Fig. 4b). These results imply that in nNOS neurons of  
170 controls, the bottom 11% of the distribution of ChAT mRNA puncta (Fig. 4e; expressing less  
171 than 8 puncta) lack detectable ChAT immunoreactivity. We next grouped neurons into the

172 four categories of Figure 3 on the basis of ChAT and GAD1 mRNA expression (see Methods).  
173 In control mice, 40% of the cPPN nNOS+ cells were classic cholinergic neurons, while 39%  
174 of them co-expressed ChAT and GAD1, 6% expressed neither and 5% had switched from  
175 ChAT to GAD1 (Fig. 4e). However, in runners, the percentages changed to 18% for classic  
176 cholinergic neurons, 43% for co-expressing cells, 12% for neither and 27% that had  
177 switched (Fig. 4e). These changes in the four categories are comparable to those identified  
178 by immunocytochemistry (Fig. 3c), further supporting a switch from ChAT to GAD1 in  
179 nNOS neurons. The RNAscope assay reveals that switching involves up and down  
180 regulation of transcript levels and may not entail complete disappearance and de novo  
181 appearance of transcripts of transmitter synthetic enzymes.

182

183 **Switching neurons make projections to the SN, VTA and thalamus.** To further test the  
184 link between neurotransmitter switching and motor skill learning, we identified targets  
185 innervated by the switching cholinergic neurons. PPN neurons project to the substantia  
186 nigra (SN), the ventral tegmental area (VTA) and the ventrolateral-ventromedial nuclei of  
187 the thalamus (VL-VM), all of which regulate motor skill learning (30-35). Anterograde  
188 tracing of mRuby2 in ChAT-Cre neurons (see Methods) followed by retrograde tracing with  
189 retrobeads demonstrated synaptic connections between cholinergic cPPN neurons and  
190 neurons in the SN, VTA and VL-VM (Fig. 5a-c and Supplementary Fig. 10). cPPN neurons  
191 originating projections to all three targets had lower mean numbers of ChAT transcript  
192 puncta in runners compared to controls, as demonstrated by triple labeling of retrograde  
193 beads, ChAT transcripts and nNOS protein (Fig. 5d-f and Supplementary Fig. 11). As noted  
194 above, nNOS neurons expressing less than 8 puncta appear to be those lacking ChAT  
195 immunoreactivity. In controls, the percentages of neurons that express less than 8 ChAT  
196 transcript puncta and project to the SN, VTA, and VL-VM were 11%, 8% and 6%, and  
197 increased to 42%, 11% and 19% in runners. Neurons in the increased percentages of cells



198 expressing low numbers of ChAT-transcript puncta are likely to include those that switch  
199 transmitters. The greater increase for the SN suggests that cPPN neurons switching  
200 transmitters make a major projection to the SN with smaller projections to the VTA and  
201 VL-VM.

202

203 **Transmitter switching in the cPPN is necessary for running-enhanced motor skill**

204 **learning.** To determine whether neurotransmitter switching is necessary for the beneficial

205 effect of running on motor skill learning, we injected AAV-DIO-ChAT in the cPPN of

206 ChAT-Cre mice to continuously express ChAT in all cholinergic neurons (Fig. 6a,b and

207 Supplementary Fig. 12). The ChAT-Cre line (26,27) demonstrated the same

208 running-dependent transmitter switch as wild-type mice, even with expression of control

209 constructs (AAV-DIO-mRuby2, Fig. 6c; AAV-DIO-shScr, Fig. 7b). Overexpression of ChAT did

210 not change the number of ChAT+ neurons in the cPPN of control ChAT-Cre mice and

211 maintained the number of ChAT+ neurons at control levels in the cPPN after sustained

212 running (Fig. 6c). Although the overexpression of ChAT caused a 3.3-fold increase in the

213 level of ChAT expression in control mice (Fig. 6d and Supplementary Fig. 12c), it did not

214 affect their basal motor skill learning (Fig. 6f,g and Supplementary Fig. 13e,f) or running

215 activity in runner mice (Fig. 6e and Supplementary Fig. 13a,b). This may result from

216 feedback inhibition of ChAT by ACh (36,37) that is likely to maintain ACh levels of the

217 non-switching neurons in the physiological range. Mice that had received AAV-DIO-ChAT

218 acquired the same running skill as wild-type mice or ChAT-Cre mice injected with

219 AAV-DIO-mRuby2 but their motor learning on the rotarod and balance beam, tested

220 directly after 1 week of running, was not enhanced (Fig. 6f,g). The slopes of the learning

221 curves for both rotarod and balance beam behaviors were significantly steeper for runner

222 mice expressing AAV-DIO-mRuby2 ( $10 \pm 2$  rpm/trial and  $-3.9 \pm 1.0$  s/trial) than for runners

223 expressing the AAV-DIO-ChAT ( $6 \pm 1$  rpm/trial,  $-1.3 \pm 0.4$  s/trial;  $p=0.037$  and  $p=0.035$ ) and

224 test performances of runners expressing AAV-DIO-mRuby2 were significantly better  
225 (Supplementary Fig. 13e,f). Overriding the loss of ChAT also prevented enhancement of  
226 motor skill learning when mice ran, were trained and tested, rested for one week and then  
227 re-tested (Fig. 6f,g). This finding makes it unlikely that exogenous expression of ChAT had  
228 simply delayed the improvement in motor skill learning.

229

230 Expression of a Cre-dependent viral construct (AAV-DIO-shGAD1) to suppress expression  
231 of GAD1 in the cPPN of ChAT-Cre mice similarly prevented improved motor learning  
232 following one week of running, compared to mice expressing a Cre-dependent scrambled  
233 shRNA sequence (AAV-DIO-shScr; Fig. 7a-f, Supplementary Figs. 13 and 14). Knockdown of  
234 GAD1 maintained the number of GAD1+ neurons at control levels in the cPPN after  
235 sustained running (Fig. 7b). Because immunostaining of GAD67 in the PPN detects a large  
236 number of synaptic puncta that makes it challenging to analyze cell bodies, the knockdown  
237 efficiency of GAD67 expression by GAD1 shRNA was tested in the motor cortex and  
238 measured to be 65% (Fig. 7c and Supplementary Fig. 14a,b). Suppressing the gain of GAD1  
239 did not affect acquisition of the wheel running skill (Fig. 7d and Supplementary Fig. 13c,d)  
240 but motor learning on the rotarod and balance beam, tested directly after one week of  
241 running, was not enhanced for a period that was extended to one week of rest (Fig. 7e,f).  
242 The slopes of the learning curves were again steeper for runner mice expressing  
243 AAV-DIO-shScr ( $9 \pm 1$  rpm/trial,  $-6.7 \pm 0.9$  s/trial) than for runners expressing  
244 AAV-DIO-shGAD1 ( $5 \pm 2$  rpm/trial,  $-3.7 \pm 1.0$  s/trial;  $p = 0.073$  and  $p = 0.041$ ) and test  
245 performances for runners expressing AAV-DIO-shScr were again significantly better  
246 (Supplementary Fig. 13g,h). These results suggest that both the loss of ACh and gain of  
247 GABA are required for enhancement of motor skill learning. Overriding the loss of ChAT or  
248 suppressing the gain of GAD1 did not affect running-induced activity in cholinergic cPPN  
249 neurons (Supplementary Fig. 15). Notably, suppressing the gain in GAD1 expression did

250 not affect the loss of ChAT expression and vice versa (Fig. 7g). Although expression of these  
251 two transmitter synthetic enzymes is inversely correlated, the two are not reciprocally  
252 regulated.

253

## 254 **Discussion**

255 Our findings provide new insight into the mechanism by which sustained running improves  
256 acquisition of motor skills (Fig. 8). The functional significance of ACh-to-GABA transmitter  
257 switching is demonstrated by changes in behavior that are reversed by overriding the  
258 switch. Switching involves changes in levels of transcripts of transmitter synthetic enzymes.  
259 Activity-dependent transcription factor phosphorylation (13,14) and microRNA regulation  
260 (38), which have been implicated in transmitter switching in the developing nervous  
261 system, are candidates for implementing the switch in the adult CNS. Transmitter switching,  
262 particularly when it can change the sign of the synapse from excitatory to inhibitory,  
263 appears to rewire motor circuitry to enhance motor skills. The persistence of learned  
264 behaviors after the transmitter switch has reversed implies that there is continued capacity  
265 for plasticity in locomotor circuitry.

266

267 We examined three targets of the cPPN and found that cholinergic cPPN neurons projecting  
268 to each of the three targets showed a significant reduction of ChAT transcripts (Fig. 5). This  
269 suggests that the reduction of ChAT expression might be observed in cholinergic cPPN  
270 neurons projecting to other targets as well. Multi-target regulation is not surprising  
271 because cholinergic PPN neurons have an average of five axonal collaterals that allow a  
272 single cholinergic neuron to project to many targets (18). Cholinergic cPPN neurons may  
273 regulate motor function and other behaviors by gating the activity of downstream targets  
274 through transmitter switching.

275

276 Although dopaminergic and noradrenergic neurons are implicated in motor function  
277 plasticity (39-42), our results unexpectedly indicate that acquisition of high-demand  
278 rotarod and balance beam performance requires transmitter switching in cholinergic cPPN  
279 neurons. Overriding transmitter switching did not affect the ability to run on a running  
280 wheel (Figs. 6 and 7), perhaps because running is not an exceptionally taxing motor skill.  
281 Consistent with these results, selective lesions of cholinergic PPN neurons impair learning  
282 of high-demand running on an accelerating-speed rotarod but do not affect learning of  
283 low-demand running on a fixed-speed rotarod or basal locomotion (43). In contrast,  
284 glutamatergic and GABAergic PPN neurons regulate gait and speed of locomotion (44-46).  
285  
286 The balance of Parkinson's disease and stroke patients is improved following sustained  
287 treadmill training (47,48). Our finding that transmitter switching after running is a critical  
288 event for improving motor skill learning suggests that transmitter switching may be  
289 important in many circumstances where sustained exercise benefits behavior.

290

## 291 **Acknowledgements**

292 We thank Kyle Jackson, Vaidehi Gupta and Wuji Jiang for experimental assistance, Alex  
293 Glavis-Bloom for technical support and Larry Squire and Takaki Komiyama for comments  
294 on the manuscript. We thank all members of the Spitzer lab for suggestions on  
295 experimental design and the manuscript. We thank Stefan Leutgeb and Byungkook Lim for  
296 providing transgenic mice. We thank Jennifer Santini and the UCSD Microscopy Core for  
297 technical support with imaging and Amanda Roberts and the Scripps Animal Models Core  
298 for suggestions on behavior experiments. This research was supported by grants to N.C.S  
299 from the Ellison Medical Foundation, the W. M. Keck Foundation and the Overland  
300 Foundation.

301

302 **Author Contributions**

303 H.L. and N.C.S. conceived the study, designed the experiments, interpreted the results and  
304 wrote the paper. H.L. performed the experiments and analyses.

305

306 **Competing interesting statement**

307 The authors declare that they have no competing financial interests.

308

309 **Methods**

310 **Mice** All animal procedures were carried out in accordance with NIH guidelines and  
311 approved by the University of California, San Diego Institutional Animal Care and Use  
312 Committee or Scripps Institutional Animal Care and Use Committee. C57BL/6J  
313 (JAX#000664) mice were obtained from Jackson Laboratories. ChAT-IRES-Cre  
314 (JAX#006410) mice were obtained from the Byungkook Lim lab and Jackson Laboratories.  
315 PV-IRES-Cre (JAX#008069) mice were provided by the Stefan Leutgeb lab. Animals were  
316 maintained on a 12 h:12 h light:dark cycle (light on: 10:00 pm-10:00 am) with food and  
317 water ad libitum. The ChAT-IRES-Cre colony was maintained by breeding homozygous  
318 male ChAT-Cre mice with female wild-type C57BL/6J mice. Heterozygous ChAT-Cre  
319 offspring were used in the study. Both heterozygous and homozygous PV-IRES-Cre mice  
320 were used. All experiments were performed on 8 to 12-week-old male mice.

321

322 **Behavioral assays** *Wheel running* Mice were single-housed in hamster cages and provided  
323 with FastTrac (Bio-serv, K3250) or digital (Med Associates ENV-044) running wheels that  
324 are identical in shape and size. Mice were allowed voluntary running for one week and  
325 were continuously recorded with Swann DVR4-2600 infrared video cameras. Control mice  
326 were housed with running wheelbases without wheels. Episode duration and time with the  
327 wheel were hand-scored using JWatcher software. The maximum angular excursion of

328 mouse movements on the running wheels was plotted using Image J and measured with a  
329 protractor. The digital running wheels recorded running distance and running speed was  
330 calculated as distance divided by time.

331 *Rotarod* Training and tests were performed as the rotarod (Ugo Basile, 57624) accelerated  
332 from 5 rpm to 80 rpm in 6 min. The rpm at which mice fell off was recorded by the rotarod.  
333 Mice were trained for 9 trials on the first day, followed by 3 tests the next day and 3 retests  
334 after 1, 2, or 4-weeks rest. There was a 10-minute interval between each trial/test. The  
335 single digit accuracy of the slopes of learning curves reflects the accuracy of recording the  
336 rpm at fall by the rotarod.

337 *Balance beam* Mice were trained and tested with balance beams 1 meter long and 0.75  
338 meters above the floor. 12 mm and 6 mm square beams (S-12 and S-6) were single plastic  
339 horizontal bars while 6 mm and 4 mm rod beams (R-6 and R-4) consisted of two stainless  
340 steel parallel bars 5 cm apart. On the training day mice were trained to cross S-12 for 3  
341 trials, S-6 for 3 trials, R-6 for 3 trials and then R-4 for 3 trials, each 10 minutes apart. On the  
342 test and retest day mice were allowed to cross all four beams in the same order, three times  
343 for each, 10 minutes apart. A video camera was installed at the end of the beam where mice  
344 started walking. At the other end of the beam, a black box with an entry facing the beam  
345 was installed to attract mice to cross the beams. Time to cross the beam and enter the  
346 escape box was hand-scored and the investigator was double-blinded to the history of the  
347 mice. The slopes of learning curves are accurate to one decimal place because the time to  
348 cross the beam was hand scored and human response time is 0.1~0.2 seconds.

349 *Motor skill learning* The mean speed at fall from a rotarod for the nine trials on the training  
350 day was fitted by a one-phase association model. Mean data points for each training trial  
351 were plotted and fitted using GraphPad Prism 7 software and the coefficient of  
352 determination ( $R^2$ ) was used to justify the fit ( $R^2 > 0.96$  for controls and  $R^2 > 0.95$  for runners,  
353 with MATLAB). The mean time to cross a 4 mm rod beam for the three trials on the training

354 day was fitted by linear regression ( $R^2 > 0.98$  for controls and  $R^2 > 0.99$  for runners, with  
355 MATLAB).

356 *Locomotor activity* Mice were tested for 120 minutes in polycarbonate cages (42 x 22 x 20  
357 cm) placed in frames (25.5 x 47 cm) mounted with two levels of photocell beams at 2 and 7  
358 cm above the bottom of the cage (San Diego Instruments, San Diego, CA). The two sets of  
359 beams detect both horizontal (roaming) and vertical (rearing) behavior. A thin layer of  
360 bedding material covered the bottom of the cage. Data were collected in 1-min epochs.

361

362 **Histology and immunocytochemistry** Animals were perfused transcardially with  
363 phosphate-buffered saline (PBS) followed by 4% paraformaldehyde (PFA) in PBS right  
364 after the last episode of running, i.e. mice started to run at 10 am at light-off and kept  
365 running until they were perfused between 2 to 3 pm. Brains were dissected and post-fixed  
366 in 4% PFA for 16 to 24 h at 4°C, washed in PBS for 1 min and transferred to 30% sucrose in  
367 PBS for 2 days at 4°C. 40- $\mu$ m coronal sections were cut on a microtome (Leica SM2010R)  
368 and stained.

369 For immunostaining, sections were permeabilized and blocked in 24-well culture plates for  
370 2 h in a blocking solution (5% normal horse serum, 0.3% Triton X-100 in PBS) at 22-24°C.  
371 Primary and secondary antibodies were diluted in the blocking solution. Incubation with  
372 primary antibodies was performed for 48 h on a rotator at 4°C. After washing in PBS (3  
373 times, 15 min each), secondary antibodies were added for 2 h at 22-24°C. For  
374 immunofluorescence, sections were mounted with Fluoromount-G (Southern Biotech) or  
375 ProLong Gold Antifade Mountant (Life Technologies) containing DRAQ-5 (Thermo Fisher,  
376 62251, 1:1000 dilution; when nuclear staining was needed) after washes in PBS (3 times,  
377 15 min each).

378 For DAB (3,3'-Diaminobenzidine) staining, sections were treated with 0.3% hydrogen  
379 peroxide for 30 min, washed in PBS (3 times, 5 min each), incubated with Vectastain Elite

380 ABC HRP mixture (Vector Laboratories, PK-6100) for 45 min, washed in PBS (3 times, 15  
381 min each), and signals were developed using the DAB Peroxidase Substrate kit (Vector  
382 Laboratories, SK-4100).

383 Primary antibodies used in this study were goat anti-ChAT (Millipore, AB144P, 1:500),  
384 rabbit-anti-nNOS (Thermo Fisher, 61-7000, 1:500), goat anti-cFos (Santa Cruz, sc-52G,  
385 1:300), rabbit-anti-cFos (Santa Cruz, sc-52, 1:300), mouse-anti-cFos (Abcam, ab208942,  
386 1:500), rabbit-anti-PV (Swant, PV25, 1:2000), goat-anti-VACHT (Millipore, ABN100, 1:500),  
387 mouse-anti-NeuN (Millipore, MAB377, 1:500), rabbit-anti-GABA (Sigma-Aldrich, A2052,  
388 1:1000) rabbit-anti-GFP (Thermo Fisher, A11122, 1:1000), chicken anti-GFP (Abcam,  
389 ab13970, 1:1000), guinea pig anti-GFP (Synaptic Systems, 132005, 1:3000),  
390 goat-anti-doublecortin (Santa Cruz, sc-8066, 1:300) and rabbit-anti-Ki67 (Cell Signaling,  
391 9129, 1:300). Secondary antibodies for immunofluorescence were from Jackson  
392 ImmunoResearch Labs and used at a concentration of 1:600: Alexa Fluor-488  
393 donkey-anti-rabbit (705-545-003), Alexa Fluor-488 donkey-anti-guinea pig (706-545-148),  
394 Alexa Fluor-488 donkey-anti-mouse (715-545-150), Alexa Fluor-488 donkey-anti-goat  
395 (705-545-147), Alexa Fluor-594 donkey-anti-goat (705-585-147), Alexa Fluor-594  
396 donkey-anti-mouse (715-585-150), Alexa Fluor-647 donkey-anti-goat (705-605-147) and  
397 Alexa Fluor-647 donkey-anti-rabbit (711-605-152). Biotinylated goat anti-rabbit (BA-1000)  
398 and horse anti-goat (BA-9500) secondary antibodies for DAB staining were from Vector  
399 Laboratories and used at a concentration of 1:300.

400

401 ***In situ* hybridization** PFA fixed brains were dissected, post-fixed in 4% PFA for 16 to 24 h  
402 at 4°C and transferred to 30% DEPC-sucrose in PBS for 2 days. Subsequently, brains were  
403 embedded in 30% DEPC-sucrose and frozen with dry ice. 40-µm cryosections were  
404 collected on Superfrost Plus slides (VWR, 48311-703) and used for mRNA *in situ*  
405 hybridization. Complementary DNAs (cDNAs) of *gad1* or *slc17a6* (sequence from Allen



406 Brain Atlas) were cloned in ~800-base-pair segments into a pGEM vector. Antisense  
407 complementary RNA (cRNA) probes were synthesized with T7 (Promega, P2075) or Sp6  
408 polymerases (Promega, P1085) and labeled with digoxigenin (Roche, 11175025910).  
409 Hybridization was performed with 1 to 5 µg/ml cRNA probes at 65 °C for 20 to 24 h. Probes  
410 were detected using Anti-Digoxigenin-AP Fab fragments (Roche, 11093274910, 1:5000).  
411 Signals were developed using a mixture of 4-Nitro blue tetrazolium chloride (Roche,  
412 11383213001) and BCIP 4-toluidine salt solution (Roche, 11383221001).  
413 Fluorescent RNAscope *in situ* hybridization was performed according to the manufacturer's  
414 instructions (Advanced Cell Diagnostics) with some modifications: In an RNase-free  
415 environment, 12-µm fixed brain sections were mounted on Superfrost Plus slides  
416 immediately after microtome sectioning and air-dried in a 60°C oven for 30 min. Sections  
417 were rehydrated in PBS for 2 min and incubated for 5 min in 1× target retrieval solution at  
418 95°C. Sections were then rinsed with distilled water for 5 seconds and rinsed in 100%  
419 ethanol for 5 seconds. After air-drying, sections were incubated with the following  
420 solutions in a HybEZ humidified oven at 40°C with three rinsing steps in between each:  
421 protease III, 30 min; probes, 2 h; amplification (Amp) 1-fluorescence (FL), 30 min; Amp  
422 2-FL, 15 min; Amp 3-FL, 30 min; and Amp 4-FL, 15 min. Ready-to use Amp 1-FL, Amp 2-FL,  
423 Amp 3-FL, Amp 4-FL and 50x washing solution for rinsing steps were included in the  
424 RNAscope Multiplex Fluorescent Reagent kit. Standard immunofluorescent staining was  
425 subsequently performed in the dark as previously described (15). Probes for mouse *chat*  
426 mRNA and *gad1* mRNA were from Advanced Cell Diagnostics. Sections were 6 to 7 µm thick  
427 post-processing. Six optical sections of each physical section were examined and regions of  
428 interest (ROIs) were drawn around the boundaries of nNOS cells on the optical section that  
429 showed the best focal plane for each cell (largest cross-sectional area). These ROIs were  
430 scored for ChAT and GAD1 transcript puncta using Image J. The average area of ROIs was  
431 consistent between the control and runner groups. Based on the expression of ChAT and

432 GAD1 transcript puncta, the neurons were grouped into four categories 1) classic  
433 cholinergic neurons:  $\geq 8$  ChAT transcript puncta, no GAD1 transcript puncta; 2)  
434 co-expressing neurons:  $\geq 8$  ChAT puncta,  $\geq 1$  GAD1 puncta); 3) neurons expressing  
435 neither:  $< 8$  ChAT puncta, no GAD1 puncta; 4) switched neurons:  $< 8$  ChAT puncta,  $\geq 1$   
436 GAD1 puncta.

437

438 **Birthdating** Mice were intraperitoneally injected with BrdU (50 mg/kg) once every 12 hr  
439 for 1 week. PFA-fixed brains were dissected, post-fixed and dehydrated as described above.  
440 40- $\mu$ m cryosections were collected and treated with 1 M HCl for 30 min at 45°C for DNA  
441 denaturation. After rinsing in PBS (3 times, 5 min each), sections were incubated in a  
442 mixture of 0.3% Triton X-100 and 5% horse serum in PBS for 1 h, incubated in rat-anti  
443 BrdU antibody (AbD Serotec, MCA2060, 1:300) at 4°C overnight, rinsed in PBS (3 times, 5  
444 min each) and amplified by Alexa Fluor-488 donkey anti-rat antibody (Life Technologies,  
445 A21208, 1:600). Sections were mounted with Fluoromount containing DRAQ-5 (1:1000).

446

447 **TUNEL assay** The *In Situ* Cell Death Detection (TUNEL) Kit with TMR Red (Roche,  
448 12156792910) was used to detect *in situ* apoptosis. 40- $\mu$ m cryosections were re-fixed with  
449 1% PFA for 20 min at 22-24°C and rinsed with PBS (3 times, 5 min each). Sections were  
450 then permeabilized in 0.1% sodium citrate and 1% Triton X-100 for 1 h at 22-24°C. After  
451 rinsing in PBS (3 times, 5 min each), sections were incubated with TUNEL reaction solution  
452 according to the vendor's instruction, i.e. incubated in a mixture of 25  $\mu$ L of  
453 terminal-deoxynucleotidyl transferase solution and 225  $\mu$ L of label solution. Incubation  
454 was performed in a humidified chamber for 3 h at 37°C in the dark. Sections were rinsed  
455 and mounted with Fluoromount containing DRAQ-5 (1:1000). For a positive control,  
456 sections were treated with DNase I (10 U/mL, New England Biolabs, M0303S) for 1 h at  
457 37°C and rinsed in PBS (3 times, 5 min each), followed by incubation with the TUNEL

458 mixture.

459

460 **Imaging and data analysis** Fluorescent images were acquired with a Leica SP5 confocal  
461 microscope with a 25x/0.95 water-immersion objective and a z resolution of 1  $\mu\text{m}$ . Leica  
462 Application Suite X software was used for fluorescent cell counting and all sections within  
463 the confocal stacks were examined without maximal projection. RNAscope *in situ* signals  
464 were quantified using Image J. Exemplar images are maximum intensity projections of 6  
465 consecutive confocal sections when RNAscope signals are included (Figs. 4d and 5e) and 16  
466 to 24 confocal sections for other immunofluorescence images. Exemplar images for DAB  
467 staining and *in situ* hybridization were acquired with a NanoZoomer Slide scanner  
468 (Hamamatsu S360) with a 20x/0.75 air objective. Counting DAB-stained c-fos neurons per  
469 unit area was performed with Image J on images harvested from the NanoZoomer. To  
470 delimit the PPN in sections stained for c-fos (Fig. S2), or for TUNEL and Ki67/DCX  
471 (apoptosis and neurogenesis, Fig. S5), an adjacent section was stained for ChAT to define  
472 the boundaries of the PPN.

473

474 **Stereological counting** Stereo Investigator software (MBF Bioscience) was used to count  
475 DAB immunostained or *in situ* hybridization-stained cells. Counting was carried out using  
476 optical fractionator sampling on a Zeiss Axioskop 2 microscope (40x/0.65 Ph2 objective)  
477 equipped with a motorized stage. The population of midbrain PPN neurons was outlined on  
478 the basis of ChAT immunolabeling, with reference to a coronal atlas of the mouse brain  
479 (Franklin and Paxinos 2007, 3<sup>rd</sup> edition) and anatomical landmarks such as fiber tracts.  
480 “Caudal PPN” refers to the caudal half of PPN with reference to a transverse line normal to  
481 and halfway along the rostrocaudal axis; “rostral PPN” refers to the rostral half. To count  
482 GABAergic and glutamatergic neurons in the sections stained by *in situ* hybridization, an  
483 adjacent section was stained for ChAT to define the ROI for the boundaries of PPN. The area

484 of the ROI and the cell density were compared between the control and experimental  
485 groups to ensure that the counted areas were comparable between the two groups and that  
486 changes in cell density were consistent with changes in the absolute counts. Pilot  
487 experiments with continuous counting determined that counting every other section was  
488 sufficient to estimate the number of cholinergic, GABAergic, glutamatergic and  
489 nitrooxidergic neurons in the cPPN of each brain. Consequently, five to six sections were  
490 counted for each mouse brain. The average section thickness was measured prior to  
491 counting. Sections shrank from 40  $\mu\text{m}$  to 22–24  $\mu\text{m}$  after staining and dehydration.  
492 Exhaustive counting was performed and no sampling grid was skipped because the  
493 distribution of neurons in the cPPN is uneven. Counting was performed by two  
494 investigators double-blinded to the origin of the sections.

495

496 **Viral constructs and injection** Seven to eight-week-old male mice were anesthetized with  
497 a mixture of 120 mg/kg ketamine and 16 mg/kg xylazine and head-fixed on a stereotaxic  
498 apparatus (David Kopf Instruments Model 1900) for all stereotaxic surgeries. The caudal  
499 PPN was targeted bilaterally (cPPN: anterior–posterior (AP), -4.80 mm from bregma;  
500 mediolateral (ML),  $\pm 1.25$  mm; dorsal–ventral (DV), -3.25 mm from the dura). A total of 300  
501 nL of the Cre-on viral vectors were injected into each cPPN of ChAT-Cre mice at a rate of  
502 100 nL/min using a syringe pump (PHD Ultra™, Harvard apparatus, no. 70-3007) installed  
503 with a microliter syringe (Hampton, no.1482452A) and capillary glass pipettes with  
504 filament (Warner Instruments, no. G150TF-4). Pipettes were left in place for 5 min after  
505 injection. Titers of recombinant AAV vectors ranged from  $7.1 \times 10^{12}$  to  $2.2 \times 10^{13}$  viral  
506 particles/ml, based on quantitative PCR analysis. pAAV-hSyn-DIO-ChAT-P2A-mRuby2 and  
507 pAAV-hSyn-DIO-mRuby2 plasmids were constructed in our lab and AAV2/8 vectors were  
508 packaged in the Salk Viral Vector Core. Vector Biolabs produced  
509 AAV8-CAG-DIO-shRNAmir-mGAD1-eGFP and AAV8-CAG-DIO-shRNAmir-Scramble-eGFP

510 vectors. The shRNA sequence for mouse GAD1 is

511 *5'-GTCTACAGTCAACCAGGATCTGGTTTTGGCCACTGACTGACCAGATCCTTTGACTGTAGA-3'*

512

513 **Tract tracing** For anterograde tracing, 300 nL of Cre-on AAV8-DIO-mRuby2 vectors were  
514 unilaterally injected into the cPPN of ChAT-Cre mice as described above and axonal tracts  
515 were imaged by Leica confocal microscope. For retrograde tracing, a volume of 100 nL of  
516 retrobeads (Red Retrobeads™ IX or Green Retrobeads™ IX, Lumafluor) was injected at 100  
517 nL/min into the SNc or VTA and VL-VM. Pipettes were left in place for 10 min after  
518 injection. 3 weeks after injection, mice were sacrificed for brain examination or housed  
519 with running wheels to examine running-induced loss of ChAT transcripts using RNAscope  
520 combined with nNOS immunostaining. ChAT transcripts in neurons that contained  
521 retrobeads were quantified using Image J. Retrobead infusion coordinates were SNc (from  
522 bregma AP -3.20 mm; ML ±1.50 mm; and DV from the dura, -4.00 mm), VTA (AP, -3.10 mm;  
523 ML, ±0.50 mm; and DV, -4.25 mm), and VL-VM (AP, -2.20 mm; ML, ±1.75 mm; and DV, -3.25  
524 mm).

525

526 **Statistics and reproducibility** For comparisons between two groups, data were analyzed  
527 by Welch's t-test for normally distributed data and the Mann-Whitney U test for data not  
528 normally distributed, using Graph Pad Prism 7. For repeated samples, data were analyzed  
529 by paired t-test. Statistical analyses of the data were performed using Prism 7 software for  
530 the number of animals for each experiment indicated in the figure legends. Means and  
531 SEMs are reported for all experiments. For comparisons between multiple groups, ANOVA  
532 followed by Tukey's test was used for normally distributed data. The nonparametric  
533 Kruskal-Wallis test followed by Dunn's correction was used for data that were not  
534 normally distributed. Experiments were carried out independently twice (Figs. 2b,c, 4a,b,  
535 5b,c, 7b,c and Supplementary Figs. 1f and 5), three times (Figs. 1b,c, h-j, 2d-k, 3, 4c, d-h, 5e,f,

536 6c,d, 7g, and Supplementary Figs. 1a-d, 2, 3, 4, 6, 7, 8, 9, 11b-d, 12, 13a-d, 14c, 15), or four  
537 or more times (Figs. 1c-f, 6e-g, 7d-f and Supplementary Figs. 13e-h).

538

## 539 **References**

- 540 1. Bostan, A.C. & Strick, P.L. The basal ganglia and the cerebellum: nodes in an integrated  
541 network. *Nat. Rev. Neurosci.* **19**, 338-350 (2018).
- 542 2. Esposito, M.S. *et al.* Brainstem nucleus MdV mediates skilled forelimb motor tasks.  
543 *Nature* **508**, 351-356 (2014).
- 544 3. Dayan, E. & Cohen, L.G. Neuroplasticity subserving motor skill learning. *Neuron* **72**,  
545 443-454 (2011).
- 546 4. McKenzie, I.A. *et al.* Motor skill learning requires active central myelination. *Science* **346**,  
547 318-322 (2014).
- 548 5. Statton, M.A. *et al.* A single bout of moderate aerobic exercise improves motor skill  
549 acquisition. *PLoS ONE* **10**, e0141393 (2015).
- 550 6. Palmer, S.S. *et al.* Exercise therapy for Parkinson's disease. *Arch. Phys. Med. Rehabil.* **67**,  
551 741-745 (1986).
- 552 7. Kane, K. & Bell, A.A. core stability group program for children with developmental  
553 coordination disorder: 3 clinical case reports. *Pediatr. Phys. Ther.* **21**, 375-382 (2009).
- 554 8. Rafie, F. *et al.* Physical exercises and motor skills in autistic children. *Iran J. Public Health*  
555 **44**, 724-725 (2015).
- 556 9. Meijer, J.H. & Robbers, Y. Wheel running in the wild. *Proc. Roy. Soc. B* **281**, 20140210  
557 (2014).
- 558 10. Murphy, T.H. & Corbett, D. Plasticity during stroke recovery: from synapse to behaviour.  
559 *Nat. Rev. Neurosci.* **10**, 861-872 (2009).
- 560 11. Petzinger, G.M. *et al.* Exercise-enhanced neuroplasticity targeting motor and cognitive  
561 circuitry in Parkinson's disease. *Lancet Neurol.* **12**, 716-726 (2013).

- 562 12. Spitzer, N.C. Neurotransmitter switching in the developing and adult brain. *Ann. Rev.*  
563 *Neurosci.* **40**, 1-19 (2017).
- 564 13. Marek, K.W., Kurtz, L.M. & Spitzer, N.C. cJun integrates calcium activity and tlx3  
565 expression to regulate neurotransmitter specification. *Nat. Neurosci.* **13**, 944-950  
566 (2010).
- 567 14. Güemez-Gamboa, A. *et al.* Non-cell-autonomous mechanism of activity-dependent  
568 neurotransmitter switching. *Neuron* **82**, 1004-1016 (2014).
- 569 15. Meng, D. *et al.* Neuronal activity regulates neurotransmitter switching in the adult brain  
570 following light-induced stress. *Proc. Natl. Acad. Sci. U S A* **115**, 5064-5071 (2018).
- 571 16. Clark, P.J. *et al.* Adult hippocampal neurogenesis and c-Fos induction during escalation  
572 of voluntary wheel running in C57BL/6J mice. *Behav. Brain Res.* **213**, 246-252 (2010).
- 573 17. Boisgontier, M.P. *et al.* Individual differences in brainstem and basal ganglia structure  
574 predict postural control and balance loss in young and older adults. *Neurobiol. Aging* **50**,  
575 47-59 (2017).
- 576 18. Mena-Segovia, J. & Bolam, J.P. Rethinking the pedunclopontine nucleus: from cellular  
577 organization to function. *Neuron* **94**, 7-18 (2017).
- 578 19. Smith, Y. *et al.* Parkinson's disease therapeutics: new developments and challenges  
579 since the introduction of levodopa. *Neuropsychopharmacol.* **37**, 213-246 (2012).
- 580 20. Mena-Segovia, J. *et al.* GABAergic neuron distribution in the pedunclopontine nucleus  
581 defines functional subterritories. *J. Comp. Neurol.* **515**, 397-408 (2009).
- 582 21. Tattersall, T.L. *et al.* Imagined gait modulates neuronal network dynamics in the human  
583 pedunclopontine nucleus. *Nat. Neurosci.* **17**, 449-454 (2014).
- 584 22. Thevathasan, W. *et al.* Alpha oscillations in the pedunclopontine nucleus correlate  
585 with gait performance in parkinsonism. *Brain* **135**, 148-160 (2012).

- 586 23. Fu, R.Z. *et al.* Sub-caudal pedunclopontine nucleus (PPN) deep brain stimulation (DBS)  
587 best predicts improvements in freezing of gait questionnaire (FOGQ) scores in  
588 Parkinson's disease patients. *Mov. Disord.* **29** (Suppl 1), 1193 (2014).
- 589 24. Gut, N.K. & Winn, P. Deep brain stimulation of different pedunclopontine targets in a  
590 novel rodent model of parkinsonism. *J. Neurosci.* **35**, 4792-4803 (2015).
- 591 25. Karachi, C. *et al.* Cholinergic mesencephalic neurons are involved in gait and postural  
592 disorders in Parkinson disease. *J. Clin. Invest.* **120**, 2745-2754 (2010).
- 593 26. Madisen, L. *et al.* A robust and high-throughput Cre reporting and characterization  
594 system for the whole mouse brain. *Nat. Neurosci.* **13**, 133-40 (2010).
- 595 27. Chen, E. *et al.* Altered baseline and nicotine-mediated behavioral and cholinergic  
596 profiles in ChAT-Cre mouse lines. *J. Neurosci.* **38**, 2177-2188 (2018).
- 597 28. Saunders, A. Granger A.J. & Sabatini B.L. Corelease of acetylcholine and GABA from  
598 cholinergic forebrain neurons. *Elife* **27**, 4 (2015).
- 599 29. Vincent, S.R. *et al.* NADPH-diaphorase: a selective histochemical marker for the  
600 cholinergic neurons of the pontine reticular formation. *Neurosci. Lett.* **43**, 31-36 (1983).
- 601 30. Xiao, C. *et al.* Cholinergic mesopontine signals govern locomotion and reward through  
602 dissociable midbrain pathways. *Neuron* **90**, 333-347 (2016).
- 603 31. Dautan, D. *et al.* Segregated cholinergic transmission modulates dopamine neurons  
604 integrated in distinct functional circuits. *Nat. Neurosci.* **19**, 1025-1033 (2016).
- 605 32. Gambhir H., Mathur, R. & Behari, M. Progressive impairment in motor skill learning at  
606 12 and 20 weeks post 6-OHDA- SNc lesion in rats. *Parkinsonism Relat. Disord.* **17**,  
607 476-478 (2011).
- 608 33. Leemburg. S. *et al.* Motor skill learning and reward consumption differentially affect  
609 VTA activation. *Sci. Rep.* **8**, 687 (2018).
- 610 34. Steriade, M. *et al.* Fast oscillations (20-40 Hz) in thalamocortical systems and their  
611 potentiation by mesopontine cholinergic nuclei in the cat. *Proc. Natl. Acad. Sci. U S A* **88**,



- 612 4396-4400 (1991).
- 613 35. Jeljeli, M. *et al.* Effects of ventrolateral-ventromedial thalamic lesions on motor  
614 coordination and spatial orientation in rats. *Neurosci. Res.* **47**, 309-316 (2003).
- 615 36. Kaita, A. A. & Goldberg, A.M. Control of acetylcholine synthesis--the inhibition of choline  
616 acetyltransferase by acetylcholine. *J. Neurochem.* **16**, 1185-1191 (1969).
- 617 37. Morris, D., Maneckjee, A. & Hebb, C. The kinetic properties of human placental choline  
618 acetyltransferase. *Biochem. J.* **125**, 857-863 (1971).
- 619 38. Dulcis, D. *et al.* Neurotransmitter switching regulated by miRNAs controls changes in  
620 social preference. *Neuron.* **95**, 1319-1333 (2017).
- 621 39. Hosp, J.A. *et al.* Dopaminergic projections from midbrain to primary motor cortex  
622 mediate motor skill learning. *J. Neurosci.* **31**, 2481-7 (2011).
- 623 40. Guo, L. *et al.* Dynamic rewiring of neural circuits in the motor cortex in mouse models of  
624 Parkinson's disease. *Nat. Neurosci.* **18**, 1299-1309 (2015).
- 625 41. Vitrac C. & Benoit-Marand M. Monoaminergic modulation of motor cortex function.  
626 *Front. Neural Circuits* **11**, 72 (2017).
- 627 42. Chandler, D.J., Gao, W.J. & Waterhouse, B.D. Heterogeneous organization of the locus  
628 coeruleus projections to prefrontal and motor cortices. *Proc. Natl. Acad. Sci. U S A* **111**,  
629 6816-21 (2014).
- 630 43. MacLaren, D.A. *et al.* Deficits in motor performance after pedunculo-pontine lesions in  
631 rats – impairment depends on demands of task. *Eur. J. Neurosci.* **40**, 3224-36 (2014).
- 632 44. Caggiano, V. *et al.* Midbrain circuits that set locomotor speed and gait selection. *Nature*  
633 **553**, 455-460 (2018).
- 634 45. Roseberry, T.K. *et al.* Cell-type-specific control of brainstem locomotor circuits by basal  
635 ganglia. *Cell* **164**, 526-537 (2016).
- 636 46. Lee, A.M. *et al.* Identification of a brainstem circuit regulating visual cortical state in  
637 parallel with locomotion. *Neuron* **83**, 455-466 (2014).

- 638 47. Mehrholz, J. *et al.* Treadmill training for patients with Parkinson's disease. *Cochrane*  
639 *Database Syst. Rev.* **8**, CD007830 (2015).
- 640 48. Polese, J.C. *et al.* Treadmill training is effective for ambulatory adults with stroke: a  
641 systematic review. *J. Physiother.* **59**, 73-80 (2013).

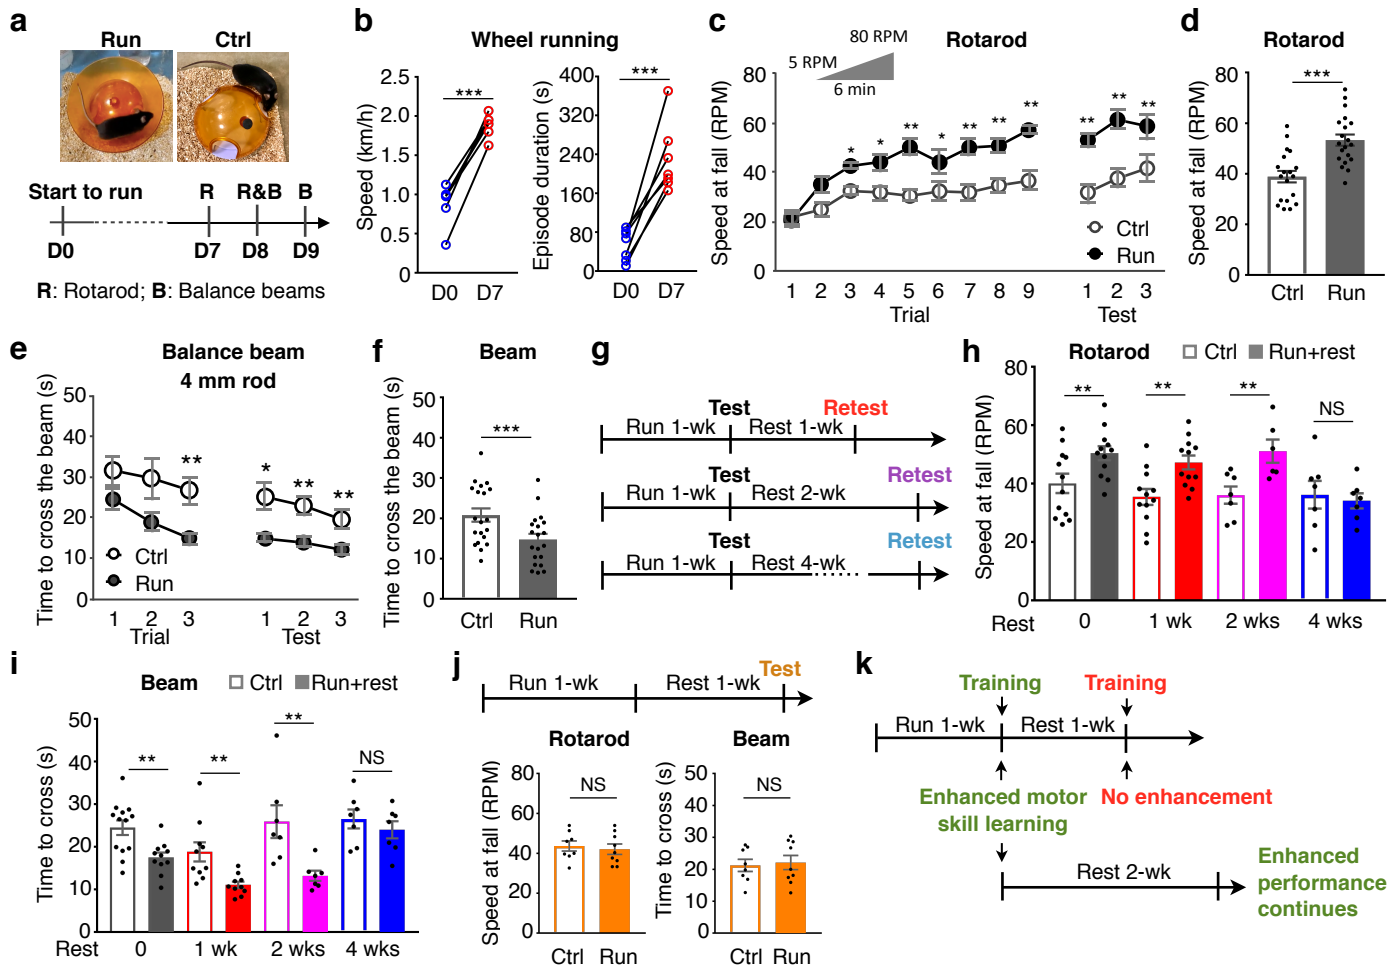

**Fig. 1 | Sustained running enhances motor skill learning.** **a**, Top: Runner mice were provided with running wheels in their home cage and control mice were housed with wheelbases. Bottom: the experimental timeline for running and behavioral tests. D, day. **b**, Mean speed (left,  $n=6$  animals/group) and mean episode duration (right,  $n=7$  animals/group) of mice running on day 0 (naive) and on day 7 (1-wk trained). **c**, Speed at fall on a rotarod in accelerative mode of each trial during training or of each test on the day after training. **d**, Mean speed at fall on a rotarod in accelerative mode in three tests on the day after training. **e**, Time to cross a 1 meter long, 0.75 meter high, 4 mm diameter rod balance beam during each trial of training or each test on the day after training. **f**, Mean time to cross the 4 mm rod beam in three tests on the day after training. For (**c-f**),  $n=19$  for Ctrl and 20 for Run. **g**, Experimental design for immediate behavioral testing and retesting. **h,i**, Mice that had run for 1 week or non-runner controls were tested with (**h**) rotarod and (**i**) balance beam (4 mm rod). After rest for 1, 2 or 4 weeks, mice were retested.  $n=12$  animals/group for 0 wk, 10 animals/group for 1 wk, 7 animals/group for 2 wks, and 7 animals/group for 4 wks. **j**, Top: experimental design for delayed behavioral testing. Bottom: performances on rotarod (left) and balance beam (right, 4 mm rod) after 1 week of running followed by 1 week of rest, compared to controls that never ran on a running wheel.  $n=8$  animals for Ctrl and 9 animals for Run+Rest. **k**, Summary of time dependence of enhanced motor skill learning. Statistical significance  $*p<0.05$ ,  $**p<0.01$ ,  $***p<0.001$  was assessed by paired t-test (**b**) or Welch's t-test (other panels). NS, not significant. Data shown are mean $\pm$ SEM.

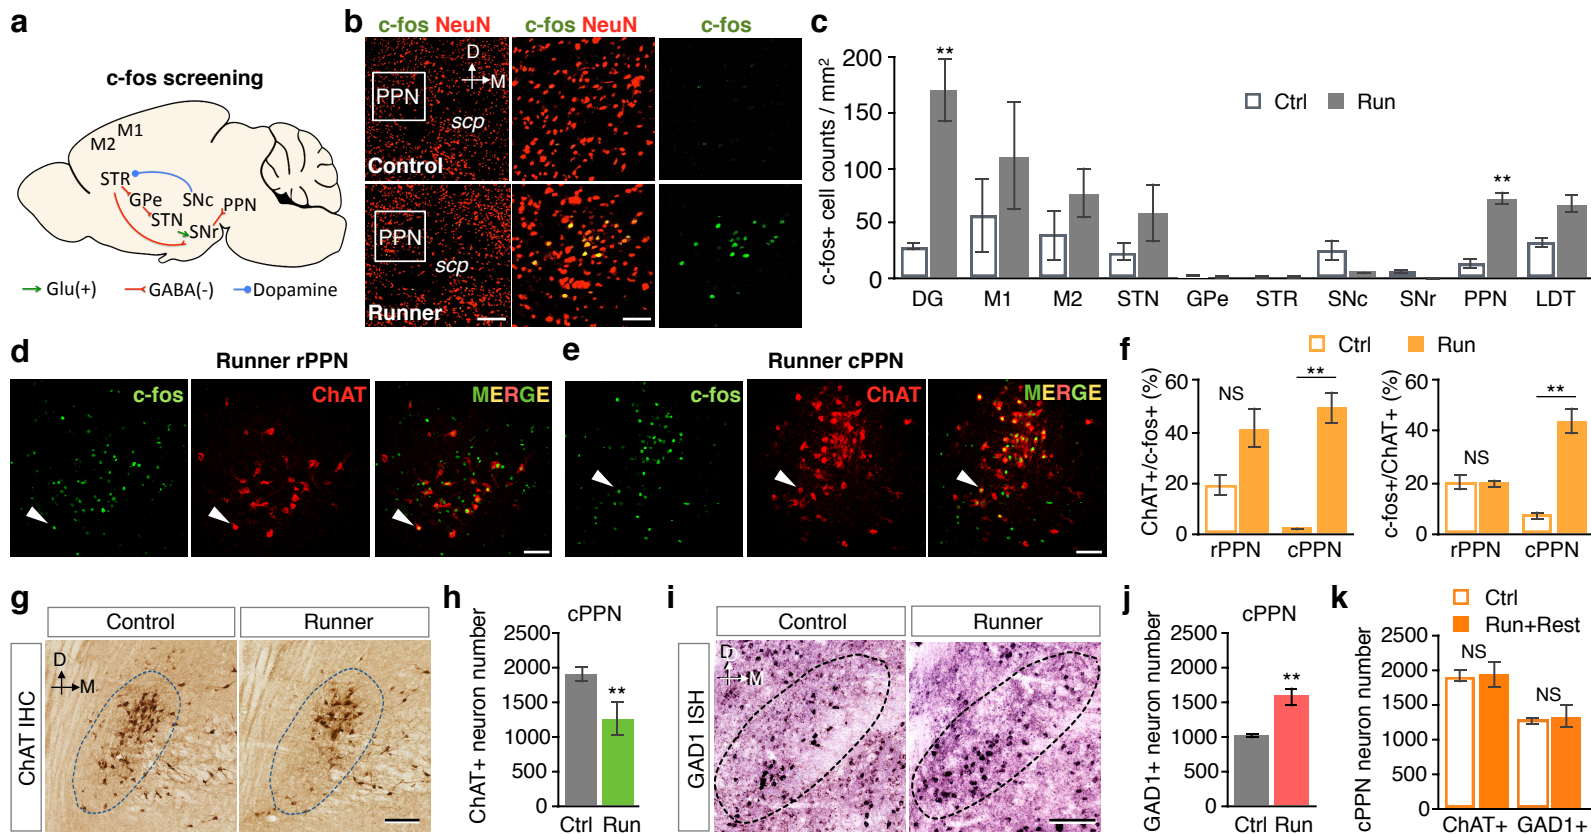

**Fig. 2 | Running activates the pedunculopontine nucleus (PPN) and triggers neurotransmitter switching in the caudal PPN.** **a**, Motor circuitry screened for activity. **b**, Double staining of neuronal marker NeuN and activity marker c-fos in a control (upper) and 1-week runner (lower). Middle and right panels are higher magnifications of the white boxes in the left panels. *Scp*, superior cerebellar peduncle. Dorsal (D) and medial (M) axes are shown at top. Scale bar, (left) 200  $\mu$ m, (middle) 50  $\mu$ m. **c**, c-fos immunoreactive neuron number in each region or nucleus of controls and 1-week runner mice. DG, dentate gyrus; M1, primary motor cortex; M2, secondary motor cortex; STN, subthalamic nucleus; GPe, globus pallidus external; STR, striatum; SNc, substantia nigra *pars compacta*; SNr, substantia nigra *pars reticulata*; PPN, pedunculopontine nucleus; LDT, laterodorsal tegmental nucleus.  $n=12$  sections from 4 animals/group. **d,e**, Double staining of ChAT and c-fos in the rostral (**d**) or caudal (**e**) PPN of a 1-wk runner. White arrowheads identify examples of c-fos+ChAT+ cells. Scale bar, 100  $\mu$ m. **f**, Percentage of the c-fos+ChAT+ neurons in the total ChAT+ neurons (left,  $p=0.07$  for the rPPN) or in the total c-fos+ neurons (right).  $n=3$  animals/group. **g**, 3,3'-diaminobenzidine (DAB) staining of ChAT in the cPPNs of a control and 1-week runner. Dotted lines outline the PPN. Dark brown stain identifies ChAT+ neurons. Scale bar, 100  $\mu$ m. **h**, Stereological counts of (**g**).  $n=6$  animals/group. **i**, *In situ* hybridization of GAD1 in the cPPN of a control and 1-week runner. Scale bar, 100  $\mu$ m. **j**, Stereological counts of (**i**).  $n=7$  animals/group. **k**, Stereological counts of ChAT+ or GAD1+ neurons in the cPPN of mice that experienced 1 week of running followed by 1 week of rest and of control mice that never ran on a running wheel.  $n=5$  animals/group. Statistical significance  $**p<0.01$  was assessed by Mann-Whitney U test. NS, not significant. Data shown are mean  $\pm$  SEM.

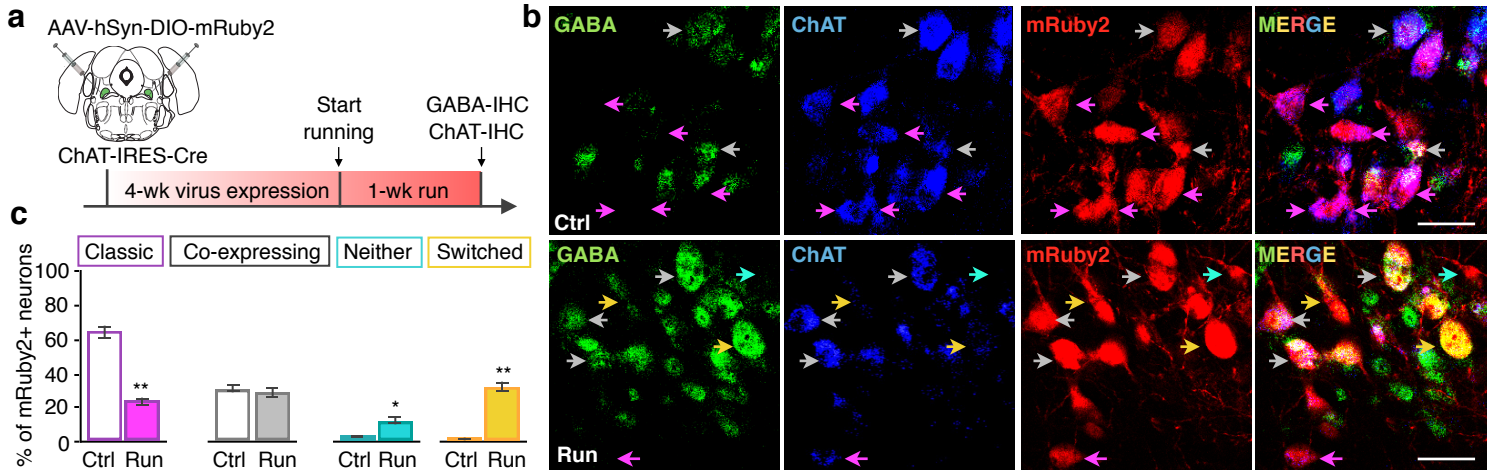

**Fig. 3 | Cholinergic cPPN neurons lose ChAT and gain GABA.** **a**, Experimental strategy to permanently label cholinergic cPPN neurons with mRuby2 fluorescent protein by expressing Cre-dependent AAV-DIO-mRuby2 in ChAT-Cre mice and determine whether the loss of ChAT and gain of GABA occur in mRuby2+ neurons. **b**, Double immunostaining of GABA and ChAT in the cPPN of a control and a 1-week runner ChAT-Cre mouse expressing AAV-DIO-mRuby2 in the cPPN. Purple arrows, mRuby2 neurons that express ChAT but not GABA (classic ChAT neurons). Grey arrows, mRuby2 neurons that express both ChAT and GABA (co-expressing neurons). Yellow arrows, mRuby2 neurons that express GABA but not ChAT (switched neurons). Cyan arrow, an mRuby2 neuron that express neither GABA nor ChAT. Scale bar, 50  $\mu$ m. **c**, The percentage of each class of mRuby2+ neurons (n= 844 for controls and 738 cells for runners). n= 3 animals/group.

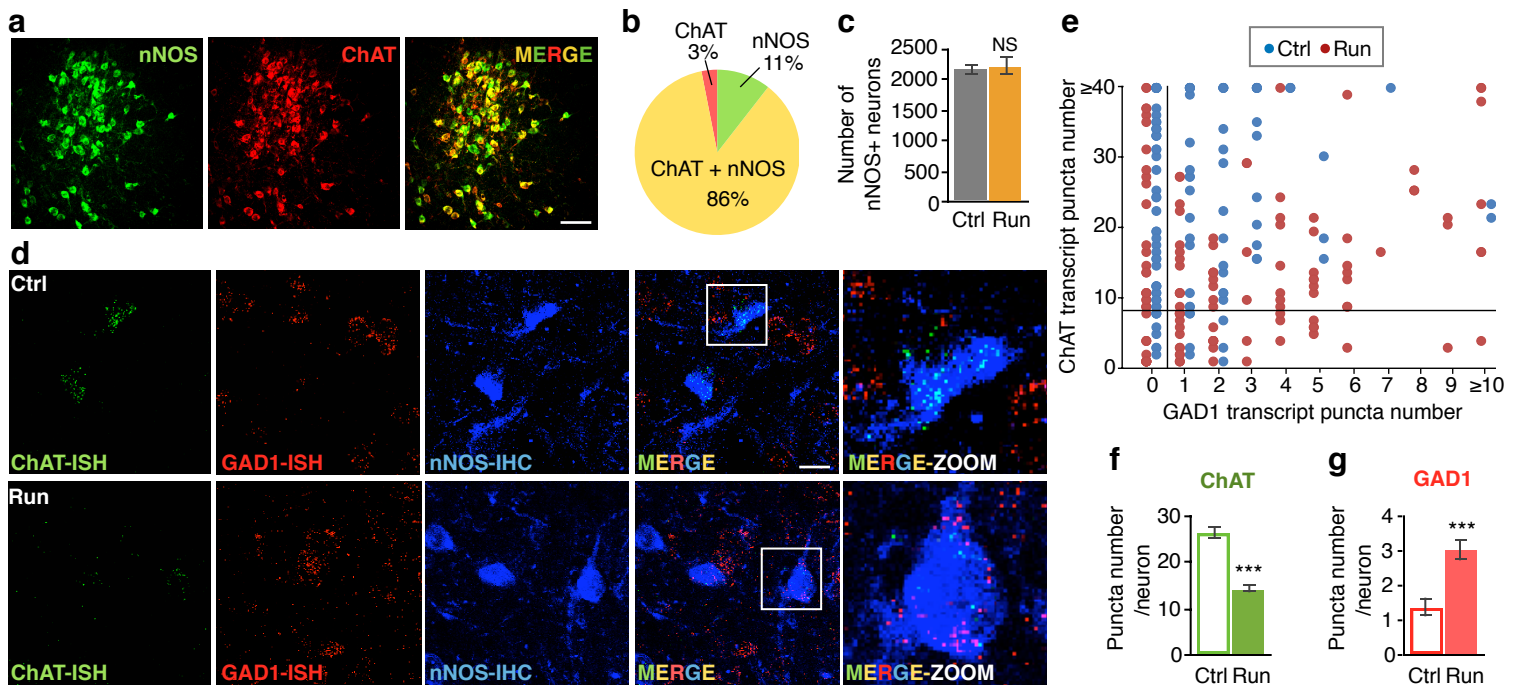

**Fig. 4 | A subset of cPPN nNOS neurons of runner mice lose ChAT transcripts and gain GAD1 transcripts.** **a**, Double staining of the cPPN in a non-runner control mouse for nNOS (green) and ChAT (red). Scale bar, 100  $\mu$ m. **b**, Co-localization of nNOS and ChAT in the cPPN.  $n=1068$  cells from 3 non-runner control mice. **c**, Stereological counts of DAB staining of nNOS in control and 1-week runner cPPNs.  $n=6$  animals/group. Mann–Whitney U test. NS, not significant. **d**, Triple staining of ChAT and GAD1 transcripts and nNOS protein in the cPPN of a control and a 1-week runner mouse. Right panels are boxed regions in merged images at higher magnification. Scale bar, 20  $\mu$ m. **e**, Scatterplot of numbers of *in situ* stained ChAT puncta (y-axis) against numbers of *in situ* stained GAD1 puncta (x-axis). Each dot represents one neuron. The vertical line divides neurons that contain zero from those containing more GAD1 transcript puncta and the horizontal line divides neurons that contain less from those containing more than eight ChAT transcript puncta. **f,g**, Y-axes are the mean number of ChAT (**f**) and GAD1 (**g**) fluorescent puncta in single nNOS+ neurons. For (**e-g**),  $n=4$  animals/group;  $n=123$  cells for Ctrl and 137 cells for Run. Statistical significance  $*p<0.05$ ,  $***p<0.001$  was assessed by Welch’s t-test. Data shown are mean $\pm$ SEM.

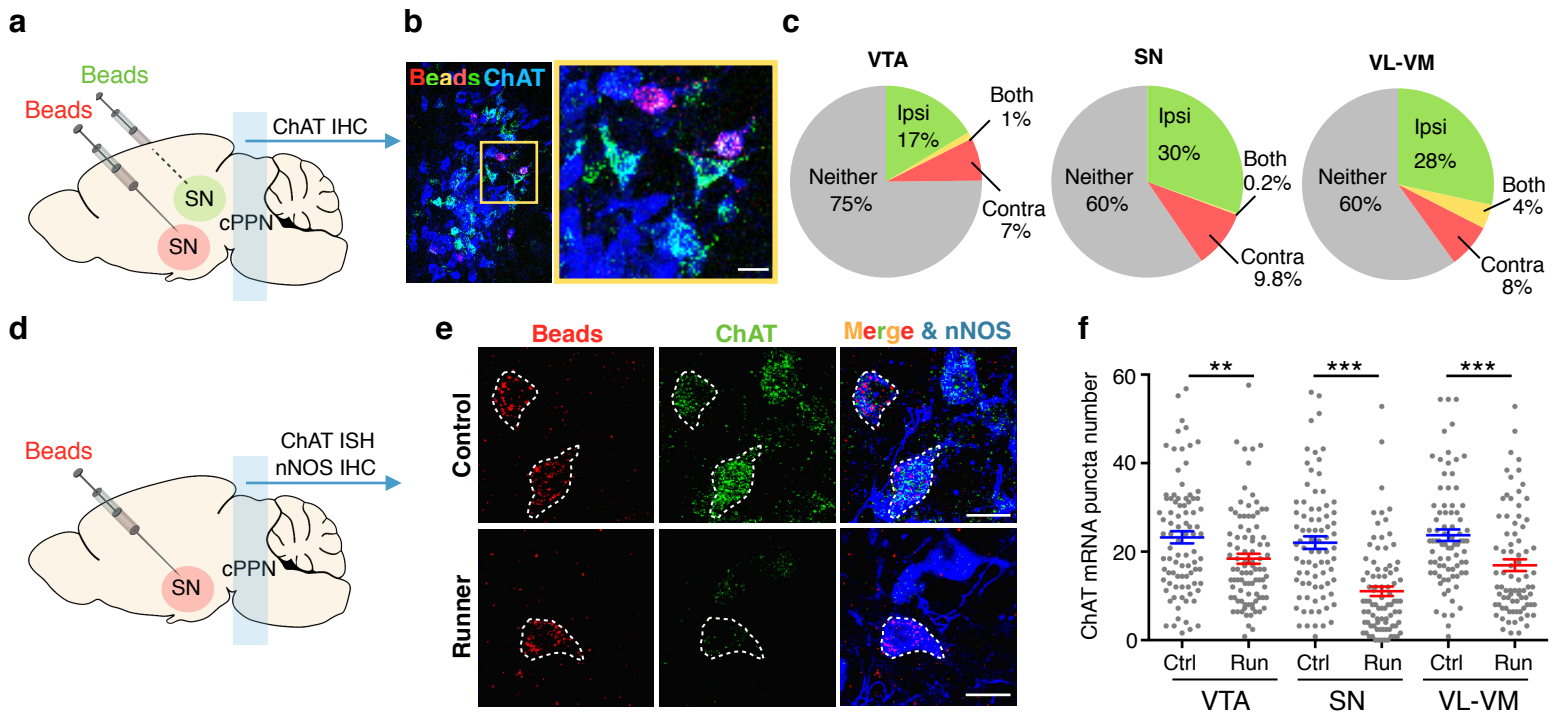

**Fig. 5 | Running reduces the number of ChAT transcripts in a subset of cholinergic cPPN neurons that project to the VTA, SN and VL-VM.** **a**, Experimental design to validate cholinergic innervation of target nuclei by the cPPN. Red or green retrobeads (beads) were injected bilaterally into target nuclei with one color per side. Substantia nigra (SN) is shown as an example. **b**, Triple-labeled retrobeads and ChAT in a coronal section of cPPN in a mouse injected with retrobeads. Scale bar, 50  $\mu$ m. **(c)** Summary of the percentage of cholinergic neurons (ChAT+) that project to corresponding nuclei. Ipsi, ipsilaterally. Contra, contralaterally. Both, both ipsi- and contralaterally. Neither, no retrobeads. n=3 animals/examined region. n= 829 cells for the VTA, 806 cells for the SN, and 812 for the VL-VM. **d**, Experimental design to identify the target(s) of neurons with decreased numbers of ChAT transcripts. SN is shown as an example. **e**, Triple-labeling of retrobeads, ChAT mRNA transcripts, and nNOS proteins in both control and runner cPPNs. Scale bar, 20  $\mu$ m. **f**, Y-axis is the mean number of ChAT fluorescent puncta in single nNOS+ cells. Each dot represents one neuron. n=4 animals/group. n=89 cells for VTA-Ctrl, 91 for VTA-Run, 81 for SN-Ctrl, 87 for SN-Run, 82 for VL-VM-Ctrl, 80 for VL-VM-Run. Statistical significance \*\* $p$ <0.01, \*\*\* $p$ <0.001 was assessed by Welch's t-test. Data shown are mean $\pm$  SEM.

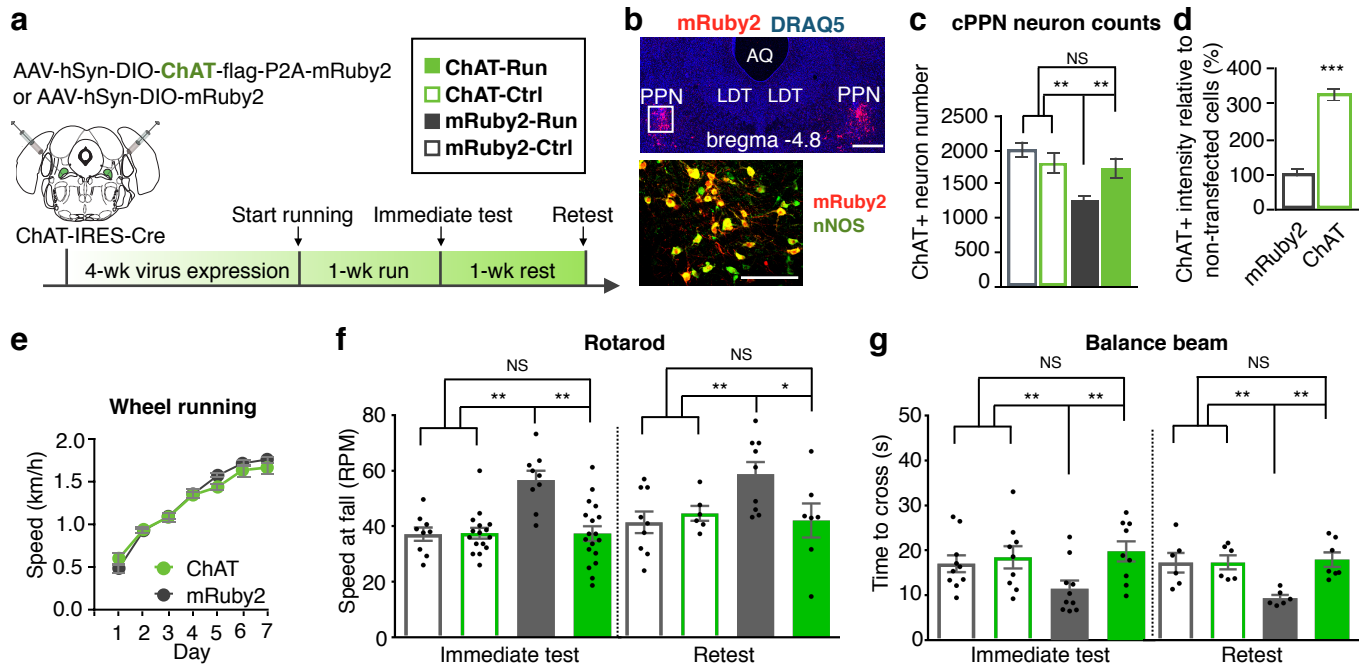

**Fig. 6 | Loss of ChAT in cholinergic cPPN neurons is necessary for running-enhanced motor skill learning.** **a**, Experimental design to override the loss of ChAT in ChAT-Cre neurons and determine behavioral relevance. **b**, Top: mRuby2 and nuclear marker DRAQ-5 show mRuby2 expression in a coronal cPPN section of an animal bilaterally-injected with AAV-DIO-ChAT-P2A-mRuby2 constructs. Coordinates adapted to Allen Brain Atlas. AQ, aqueduct. LDT, laterodorsal tegmental nucleus. Scale bar, 500  $\mu$ m. Bottom: double-labeled image of nNOS and mRuby2 in boxed region of the upper image. Scale bar, 200  $\mu$ m. **c**, ChAT+ neuron number in the cPPN of runners and non-running controls that were injected with AAV-DIO-mRuby2 or AAV-DIO-ChAT.  $n=6$  animals/group. Nonparametric Kruskal–Wallis test followed by Dunn’s correction. **d**, ChAT fluorescence intensity for mRuby2-expressing cells in ChAT-Cre mice injected with AAV-DIO-ChAT or AAV-DIO-mRuby2. Fluorescence intensity was normalized by non-transfected cells (mRuby2 negative).  $n=56$  and  $58$  cells for mRuby2 and ChAT.  $n=3$  animals/group. Welch’s t-test. **e**, Wheel running speed of mice that were injected with AAV-DIO-ChAT or AAV-DIO-mRuby2 at the cPPN.  $n=8$  animals/group. Welch’s t-test. **f,g**, Rotarod (**f**) and balance beam (**g**, 4 mm rod) tests show that expression of mRuby2 did not affect enhancement of acquisition and maintenance of motor skills gained by running (mRuby2-Run vs. mRuby2-Ctrl), whereas exogenous ChAT expression blocked the enhancement (ChAT-Run vs. mRuby2-Run). The blockade was sustained after rest for 1 week. For immediate rotarod test, numbers of animals are 9 for mRuby2-Ctrl, 16 for ChAT-Ctrl, 9 for mRuby2-Run, 18 for ChAT-Run. For rotarod retest, numbers of animals are 9 for mRuby2-Ctrl, 6 for ChAT-Ctrl, 9 for mRuby2-Run, 7 for ChAT-Run. For immediate test of balance beam, numbers of animals are 10 for mRuby2-Ctrl, 9 for ChAT-Ctrl, 10 for mRuby2-Run, 9 for ChAT-Run. For balance beam retest, numbers of animals are 6 for mRuby2-Ctrl, ChAT-Ctrl, mRuby2-Run and 7 for ChAT-Run. ANOVA followed by Tukey’s test. NS, not significant; \* $p<0.05$ , \*\* $p<0.01$ , \*\*\* $p<0.001$ . Data shown are mean $\pm$  SEM.



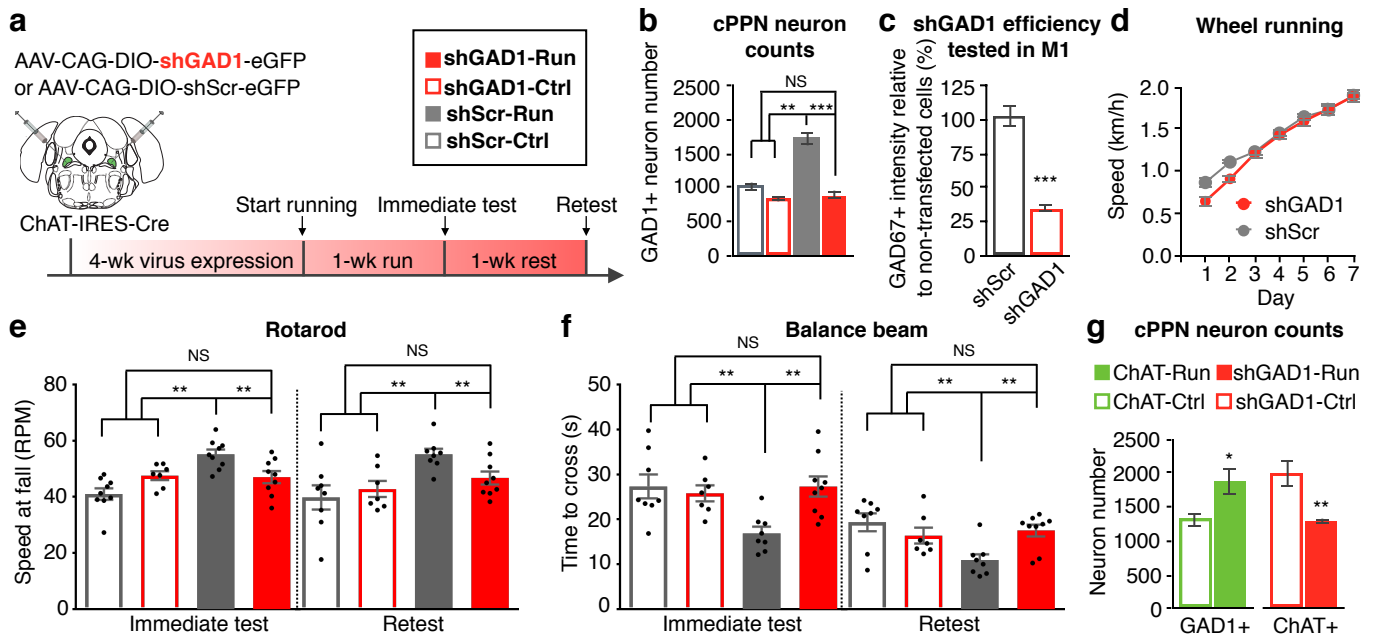

**Fig. 7 | Gain of GAD1 in cholinergic cPPN neurons is also necessary for running-enhanced motor skill learning.** **a**, Experimental design to override the gain of GAD1 in ChAT-Cre neurons and examine behavioral relevance. **b**, Numbers of GAD1 *in situ* stained neurons in the cPPNs of runners and non-running controls that were injected with AAV-DIO-shScr (scramble shRNA) or AAV-DIO-shGAD1 (shRNA for GAD1).  $n=7$  for ChAT-Run, and 5 animals for the other three groups. Nonparametric Kruskal–Wallis test followed by Dunn’s correction. **c**, Fluorescence intensity of GAD67 immunoreactivity measured in M1 PV+ cells and data from PV+/GFP+ cells normalized by that from PV+/GFP- cells.  $n=32$  and 36 cells for shScr and shGAD1.  $n=3$  animals/group. Welch’s t-test. **d**, Wheel running speed of ChAT-Cre mice that express AAV-DIO-shScr or AAV-DIO-shGAD1 in the cPPN.  $n=8$  animals/group. Welch’s t-test. **e,f**, Rotarod (**e**) and balance beam (**f**, 4 mm rod) tests show that expression of the scramble shRNA did not affect the enhancement of acquisition and maintenance of motor skills gained by running (shScr-Ctrl vs. shScr-Run) whereas knocking down GAD1 blocked the enhancement (shGAD1-Run vs. shScr-Run). The blockade was sustained after rest for 1 week. Numbers of animals are 8 for shScr-Ctrl, 7 for shGAD1-Ctrl, 8 for shScr-Run, and 9 for shGAD1-Run. ANOVA followed by Tukey’s test. **g**, Numbers of GAD1 *in situ* stained neurons in the cPPN of 1-week runners and non-runner controls that express AAV-DIO-ChAT and numbers of ChAT immunostained neurons in 1-week runners and non-runner controls that express AAV-DIO-shGAD1.  $n=5$  animals/group. Mann–Whitney U test. NS, not significant; \* $p<0.05$ , \*\* $p<0.01$ , \*\*\* $p<0.001$ . Data shown are mean  $\pm$  SEM.

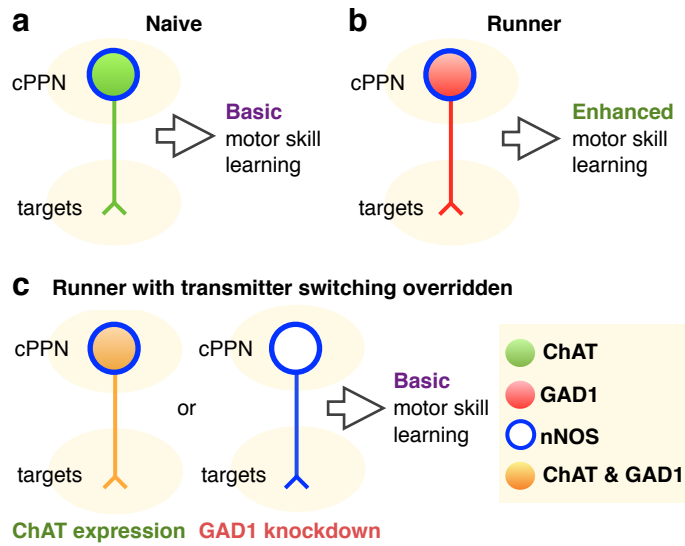

**Fig. 8 | Transmitter switching in the cPPN regulates motor skill learning.** **a,b**, Chronic running induces neurotransmitter switching from ACh to GABA in the cPPN and enhances motor skill learning. **c**, Both ChAT loss and GAD1 gain are necessary for running-enhanced motor skill learning.
